# Supplementary material
Source: ML conference proceedings conference paper supplement (https://openreview.net/forum?id=NFB4QGGS65)
Supplement: supplementary_material [file 1_babai.pdf › GPTQ-Babai/plots/1_babai.pdf]

Babai's Algorithm

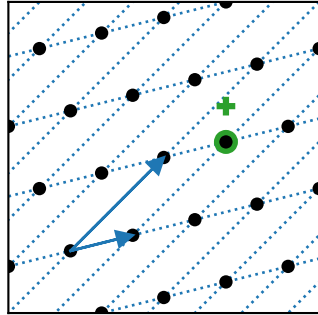

(a) Closest Vector Problem

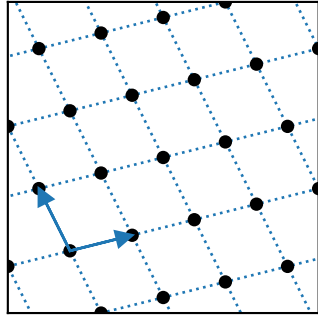

(b) Basis Reduction

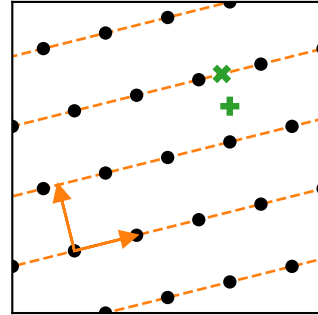

(c) Projection Step 1

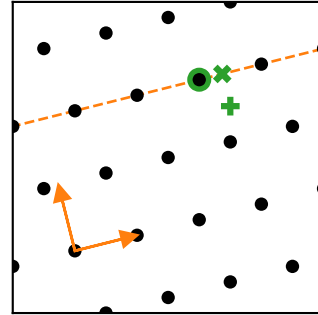

(d) Projection Step 2

Rounding Boundaries

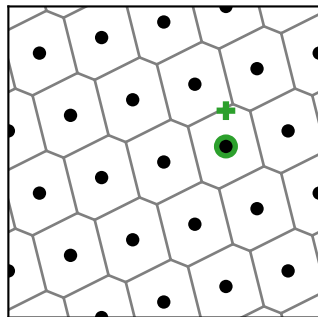

(e) Optimal / Voronoi

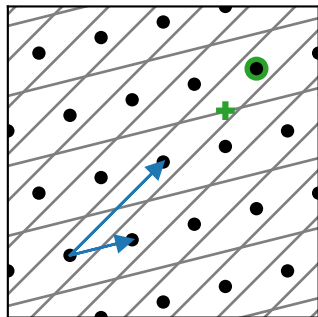

(f) Round-to-Nearest

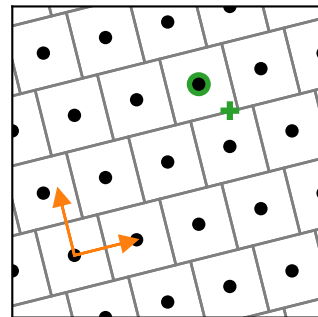

(g) Babai

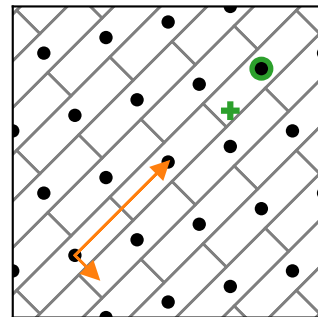

(h) Babai (Another Order)

- Lattice Point
- + Target Point
- Returned Lattice Point
- × Babai's Projected Point
- Basis Vector
- ... Basis Direction
- Gram-Schmidt Vector
- - - Babai's Hyperplane
- Rounding Boundary
