# Supplementary material
Source: ML conference proceedings conference paper supplement (https://openreview.net/forum?id=NFB4QGGS65)

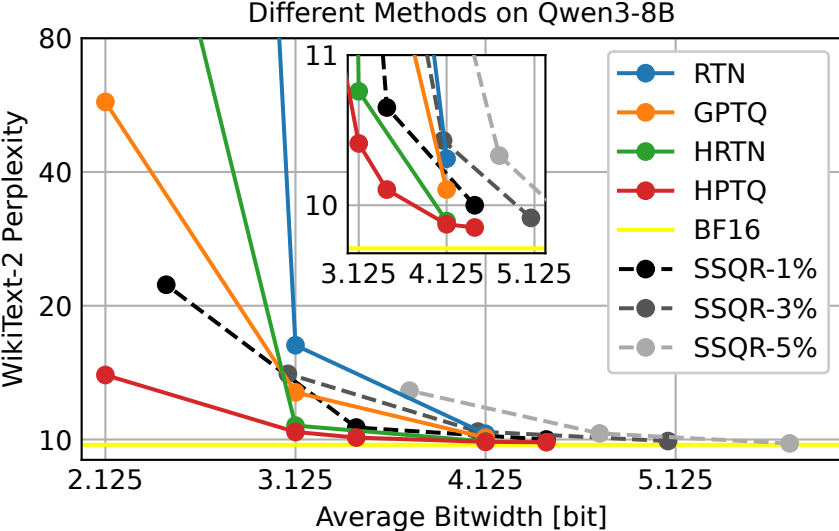

(a)

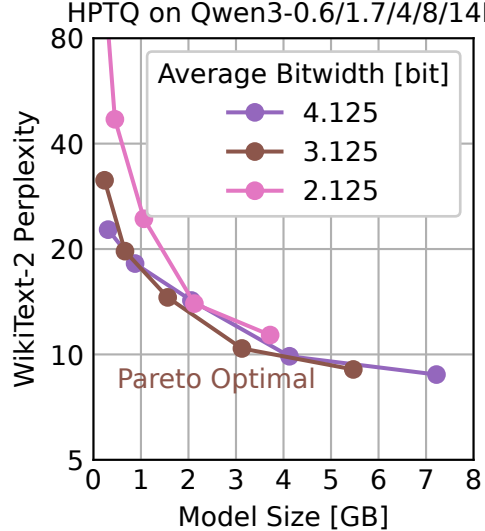

(b)

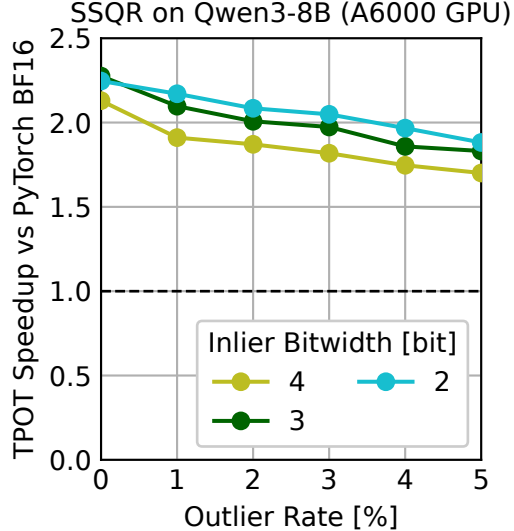

(c)

Supplement: supplementary_material [file 4_application.pdf › GPTQ-Babai/plots/4_application.pdf]

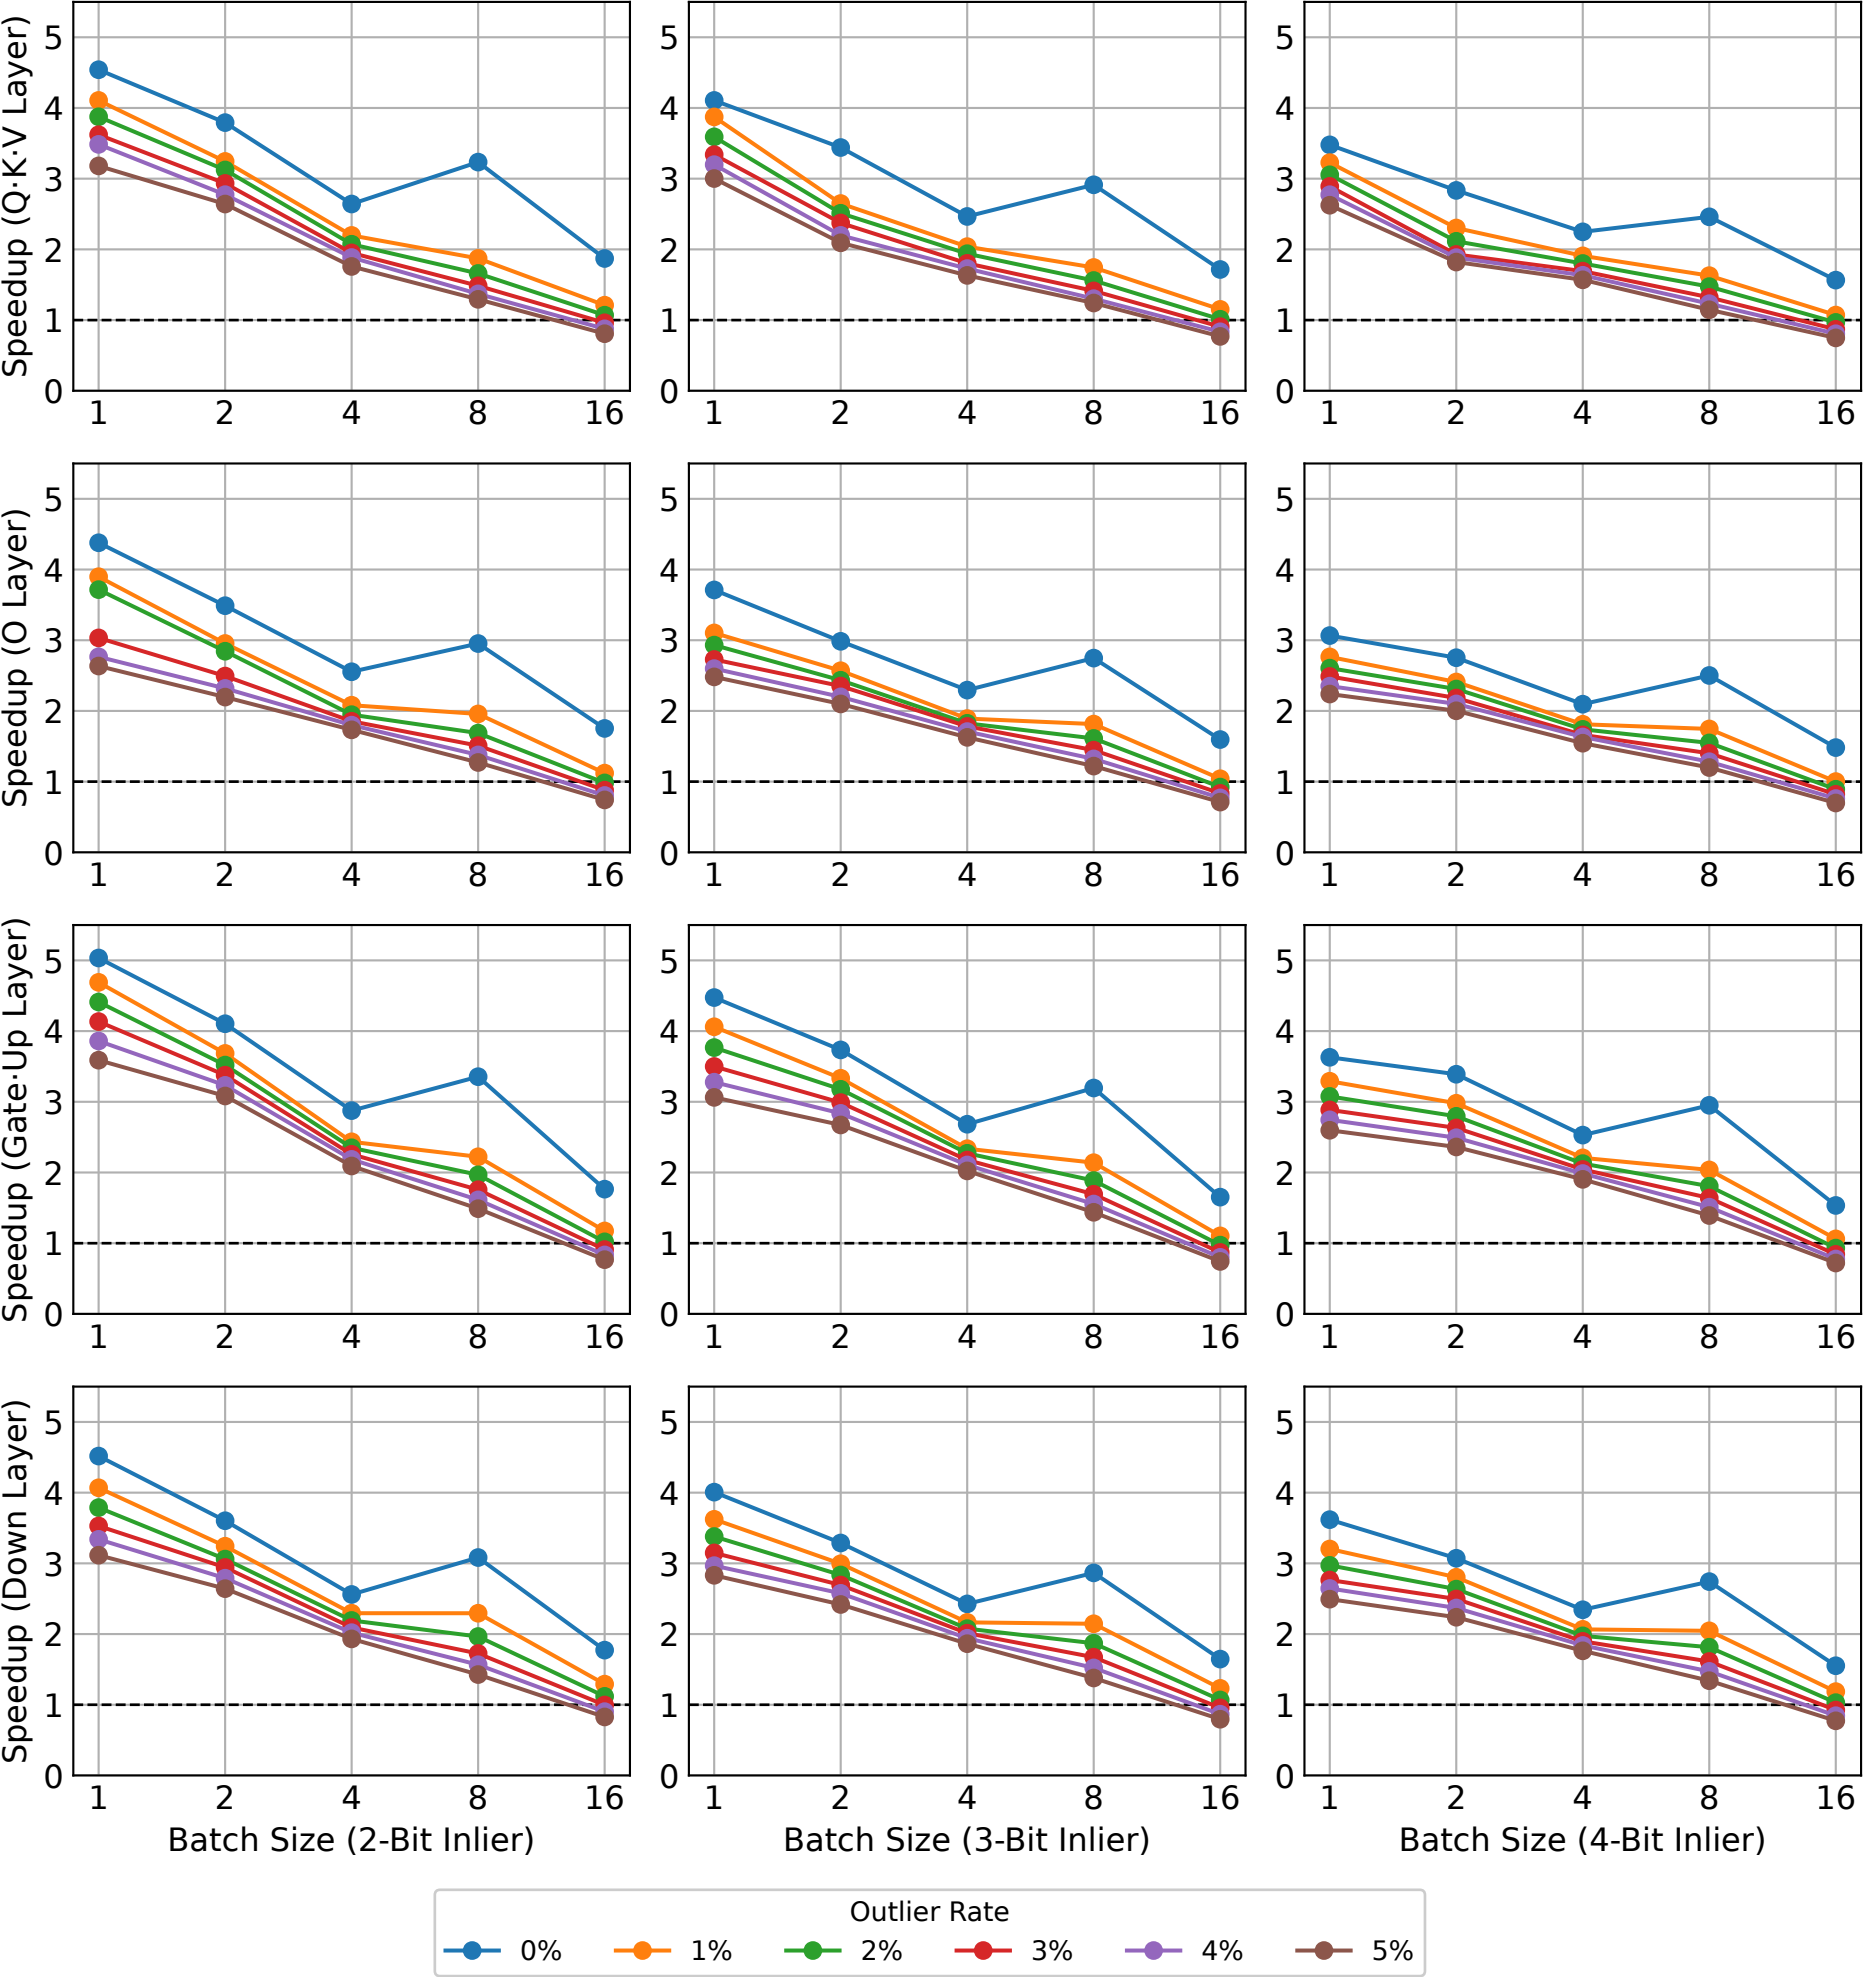

Supplement: supplementary_material [file 5_speedup.pdf › GPTQ-Babai/plots/5_speedup.pdf]
